# Supplementary material
Source: PubMed Central journal article supplement (PMC6660241)

## Supporting Information

### 9-Azido-9-deoxy-2,3-difluorosialic Acid as A Subnanomolar Inhibitor Against Bacterial Sialidases

Wanqing Li<sup>a</sup>, Abhishek Santra<sup>a</sup>, Hai Yu<sup>a</sup>, Teri J. Slack<sup>a</sup>, Musleh M. Muthana<sup>b,#</sup>, Dashuang Shi<sup>c</sup>, Yang Liu<sup>b,#</sup>, and Xi Chen<sup>a,\*</sup>

<sup>a</sup>Department of Chemistry, University of California-Davis, One Shields Avenue, Davis, CA 95616, USA

<sup>b</sup> Center for Cancer and Immunology Research, Children's National Medical Center, 111 Michigan Ave, NW, Washington DC 20012, USA

<sup>c</sup>Center for Genetic Medicine Research, Children's National Medical Center, 111 Michigan Ave, NW, Washington DC 20012, USA

\*Corresponding author. Tel: +1 530 754 6037; fax: +1 530 752 8995. E-mail address: [xiichen@ucdavis.edu](mailto:xiichen@ucdavis.edu) (X. Chen).

# Current address: Division of Immunotherapy, Institute of Human Virology, University of Maryland, Baltimore, MD 21201, United States

#### Table of Contents

|                                                                                                                                                                                  |         |
|----------------------------------------------------------------------------------------------------------------------------------------------------------------------------------|---------|
| <b>Figure S1.</b> Sialidase inhibition IC <sub>50</sub> plots for compounds <b>1–6</b> .....                                                                                     | S2–S7   |
| A) <i>A. ureafaciens</i> sialidase.....                                                                                                                                          | S2      |
| B) <i>C. perfringens</i> sialidase (CpNanI).....                                                                                                                                 | S3      |
| C) SpNanA.....                                                                                                                                                                   | S4      |
| D) <i>V. cholerae</i> sialidase.....                                                                                                                                             | S5      |
| E) BiNanH2.....                                                                                                                                                                  | S6      |
| F) hNEU2.....                                                                                                                                                                    | S7      |
| <b>Figure S2.</b> Time course study results for sialidase de-activation and re-activation in the presence or the absence of a covalent inhibitor ( <b>1</b> or <b>3–5</b> )..... | S8      |
| <sup>1</sup> H, <sup>13</sup> C, and <sup>19</sup> F NMR spectra of compounds <b>1–6</b> .....                                                                                   | S9–S14  |
| <sup>1</sup> H, <sup>13</sup> C, and <sup>19</sup> F NMR spectra of compounds <b>11–13</b> .....                                                                                 | S15–S17 |

Figure S1. Sialidase inhibition IC<sub>50</sub> plots for compounds 1–6

A) *A. ureafaciens* sialidase

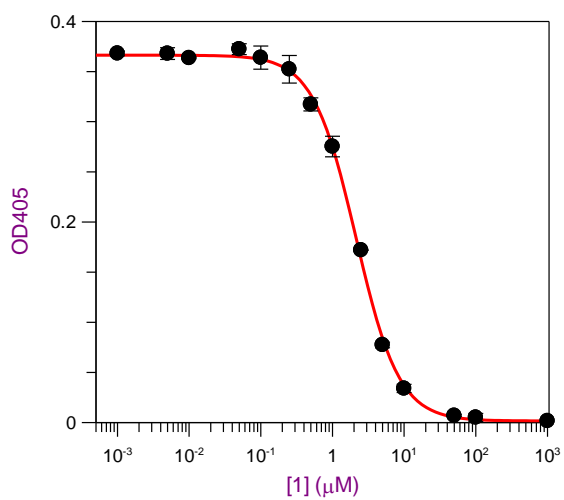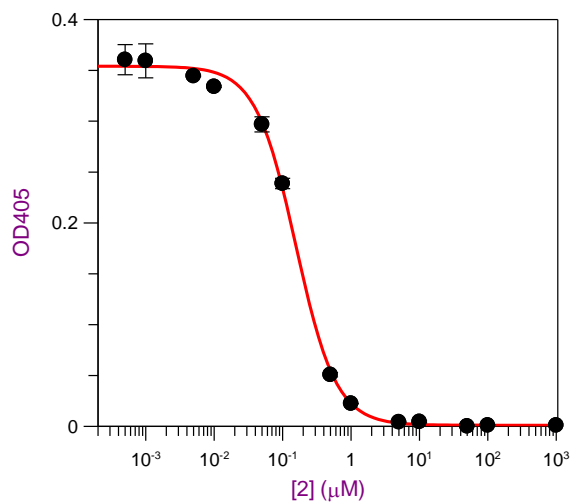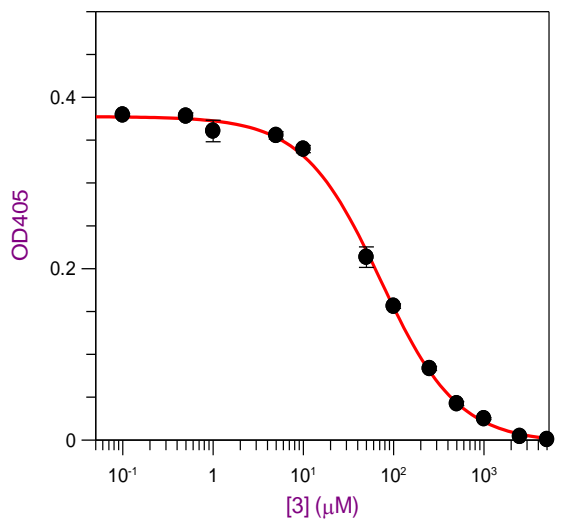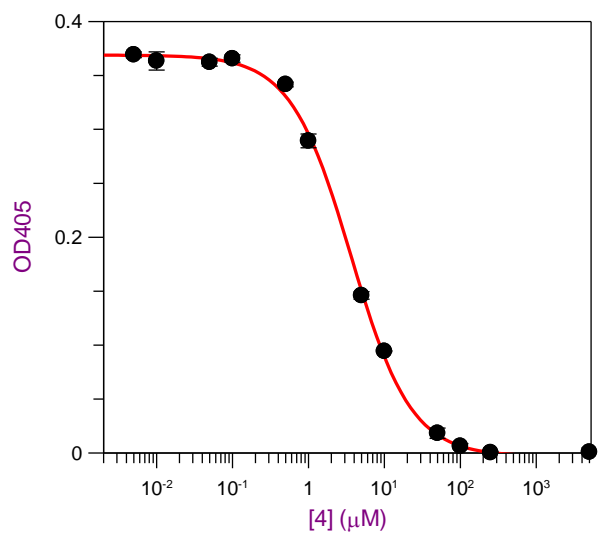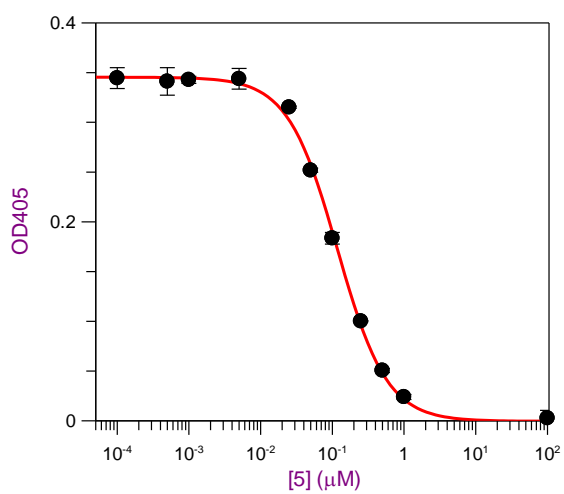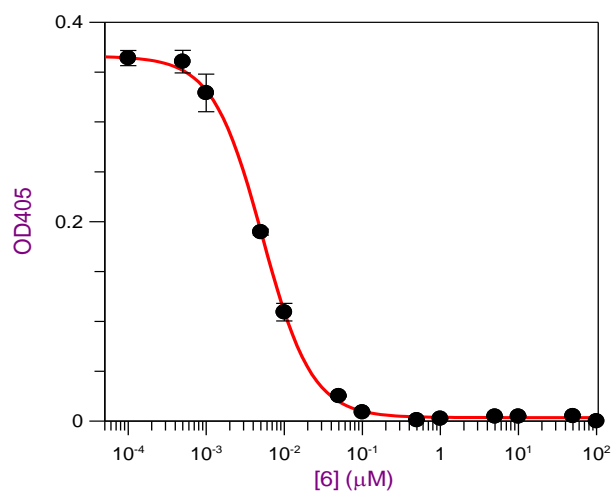

B) *C. perfringens* sialidase (CpNanI)

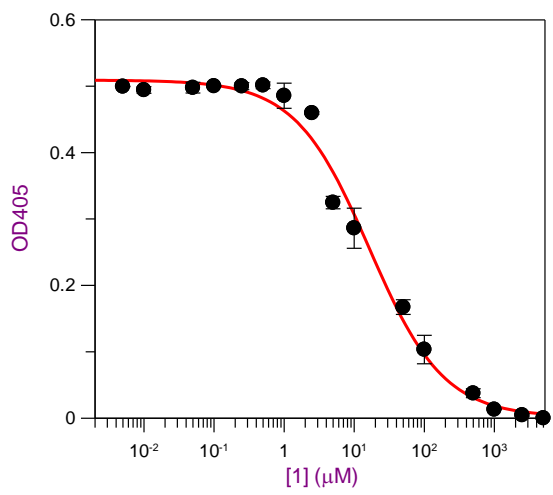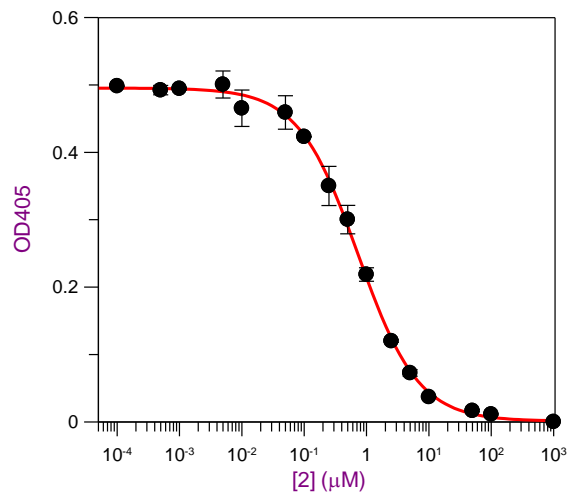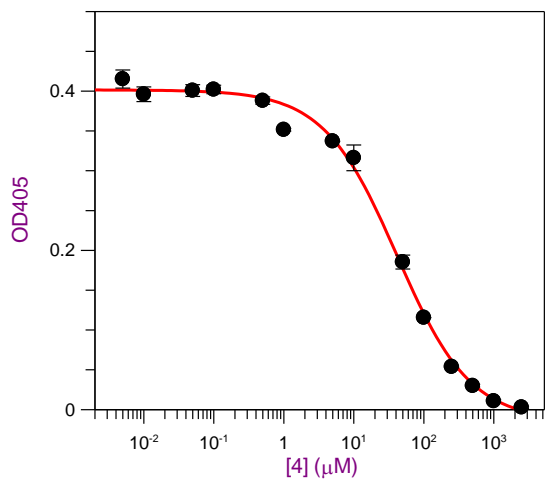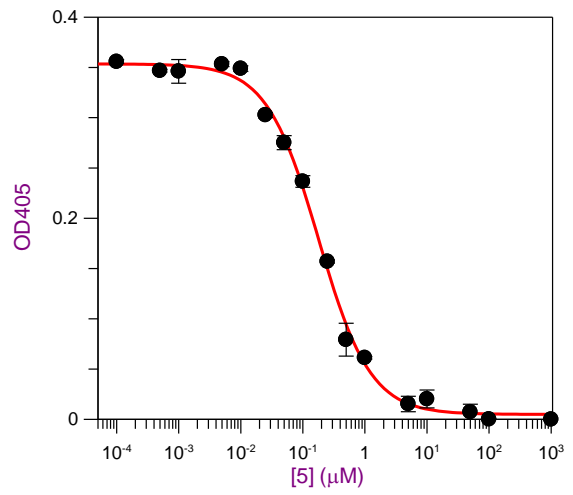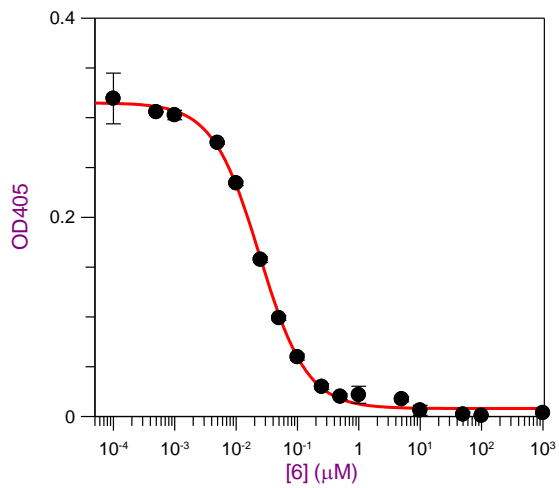

### C) SpNanA

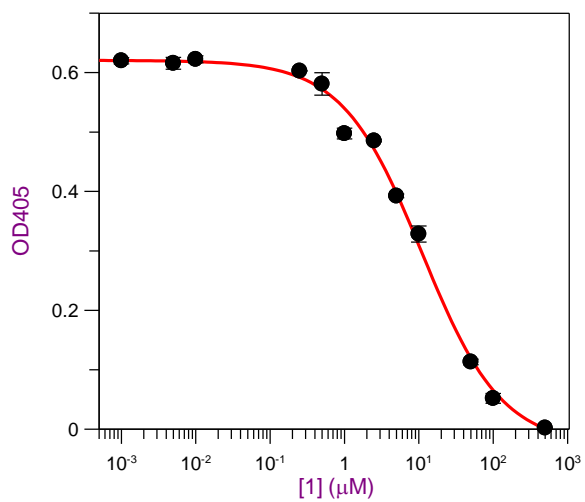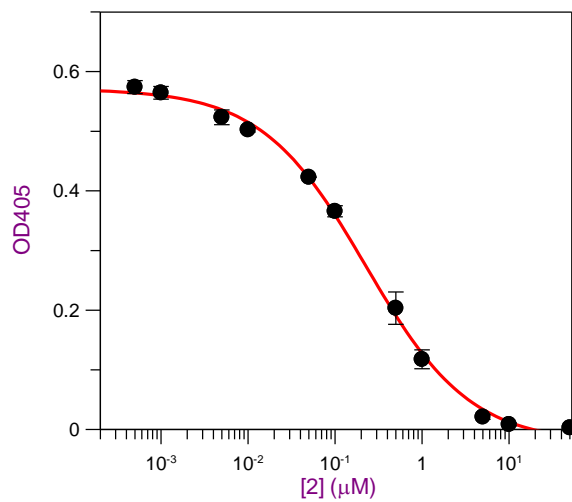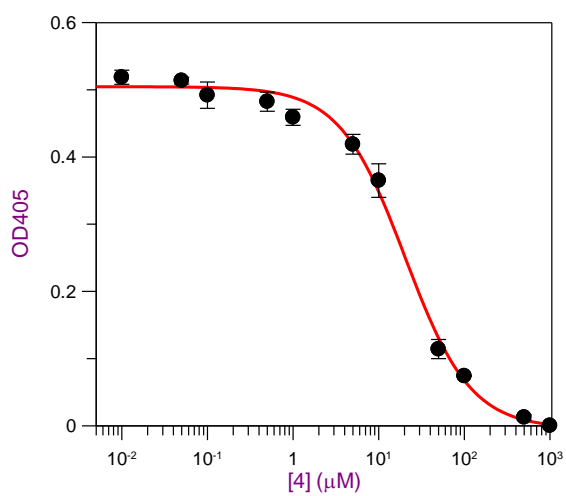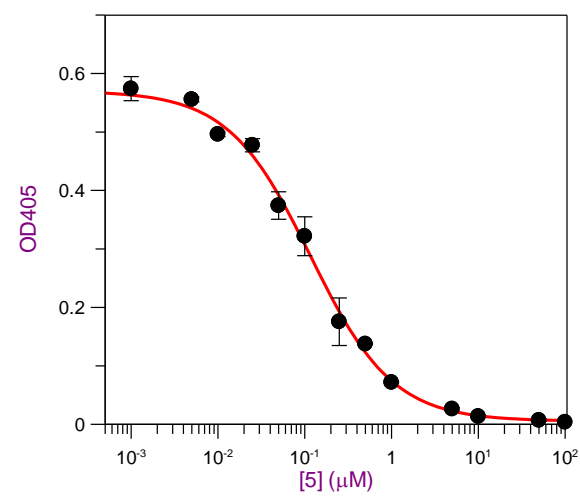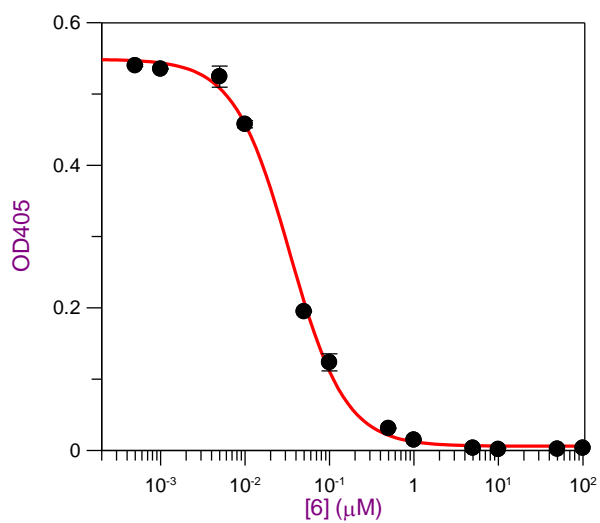

D) *V. cholerae* sialidase

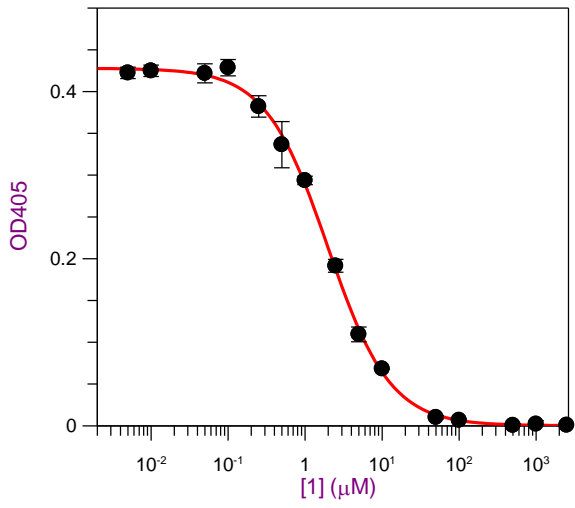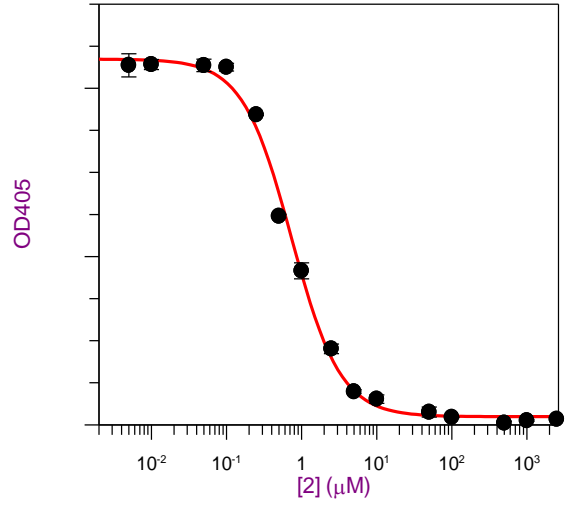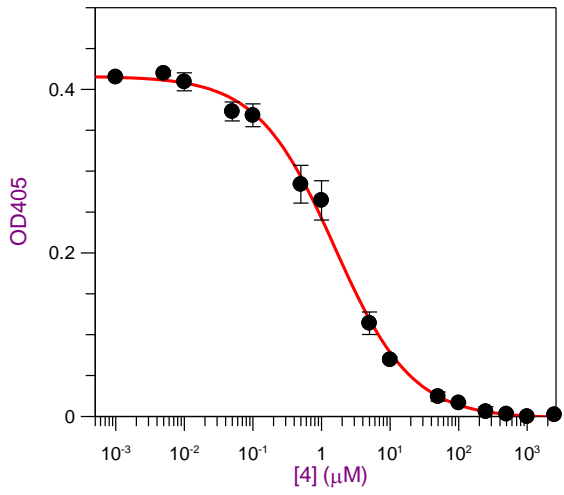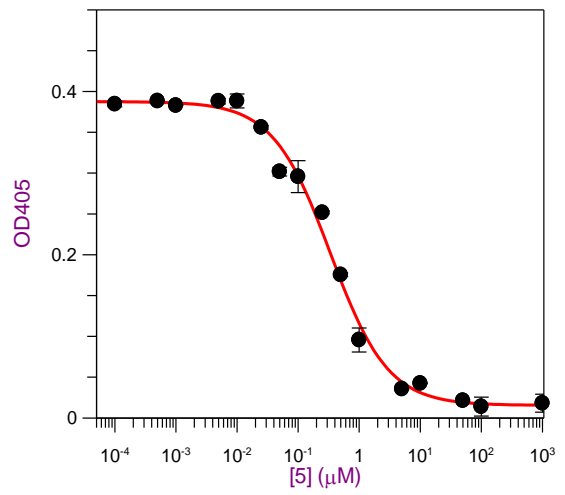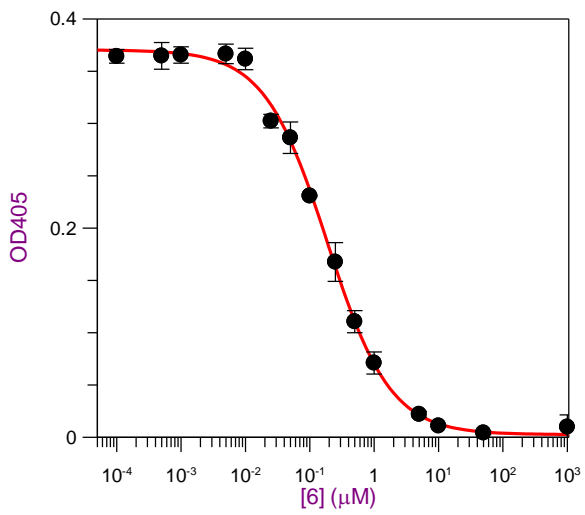

E) BiNanH2

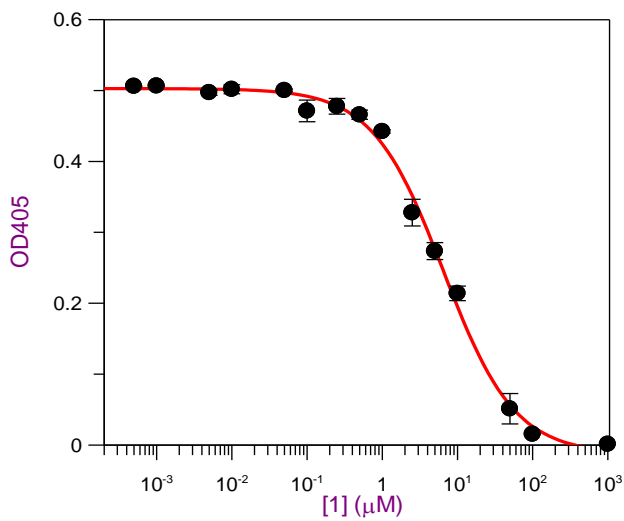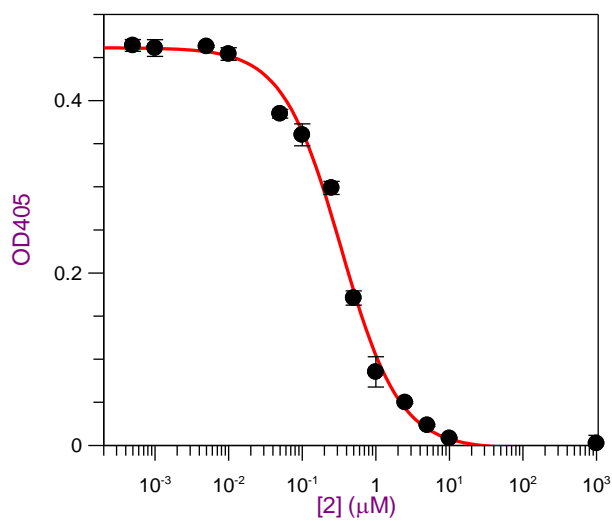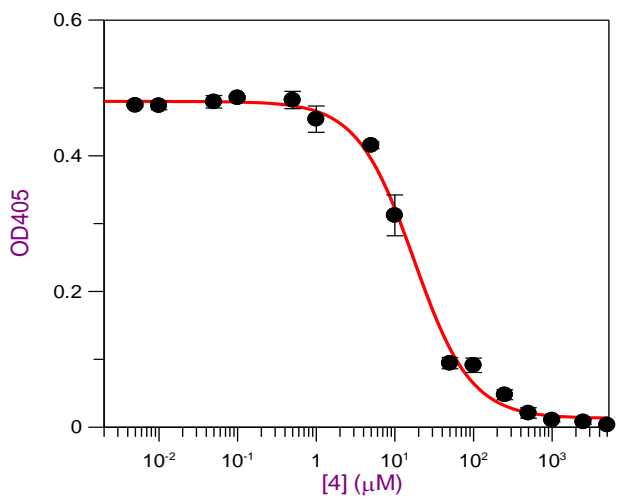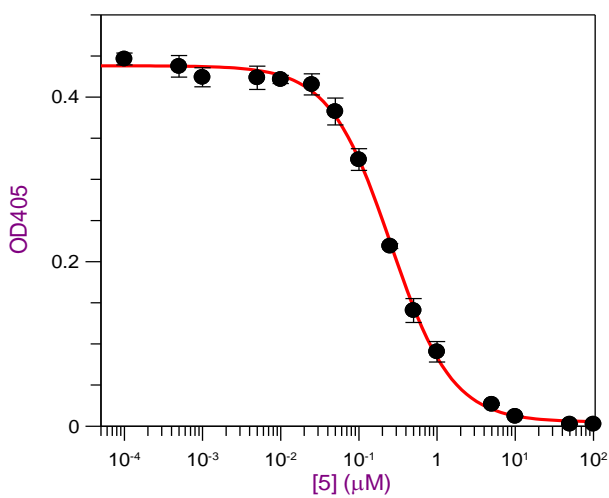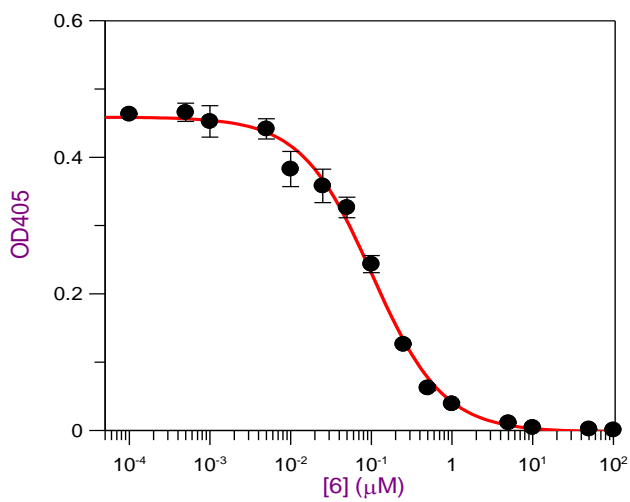

F) hNEU2

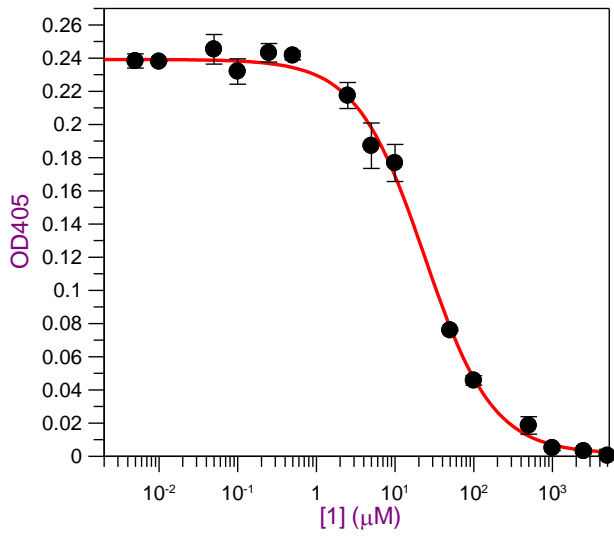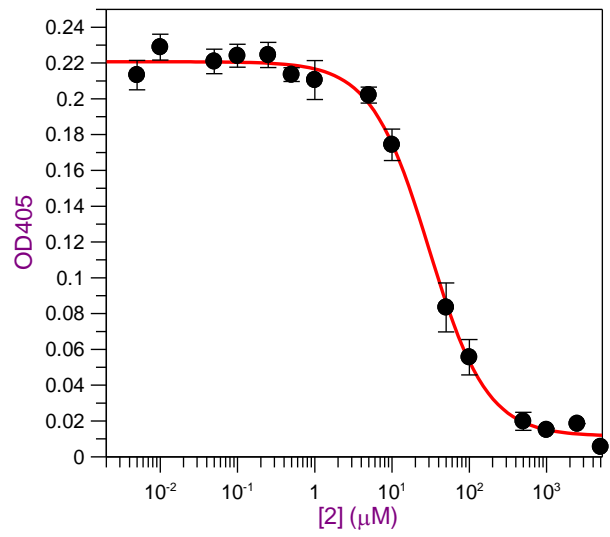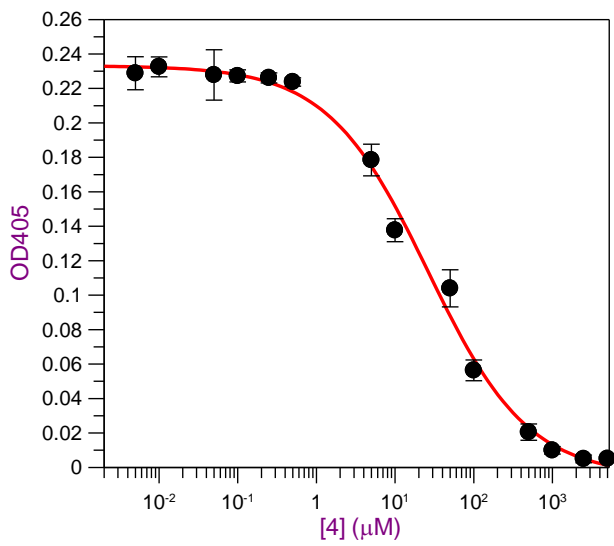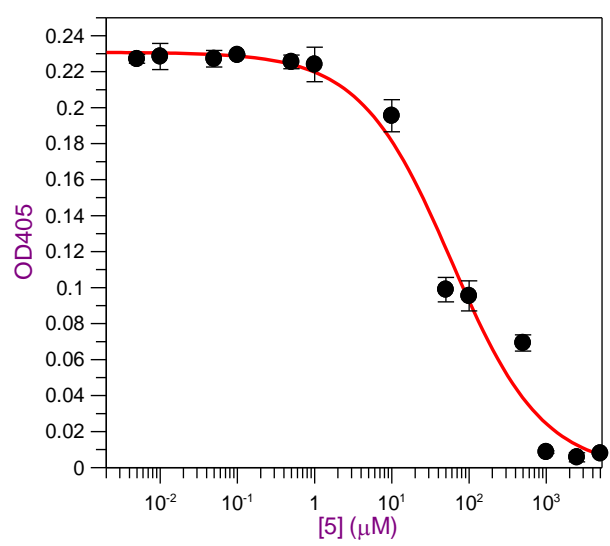

**Figure S2.** Time course study results for sialidase de-activation and re-activation in the presence or the absence of a covalent inhibitor (**1** or **3–5**). **A**, *C. perfringens* sialidase CpNanI; **B**, *V. cholerae* sialidase; **C**, SpNanA; **D**, BiNanH2; **E**, hNEU2.

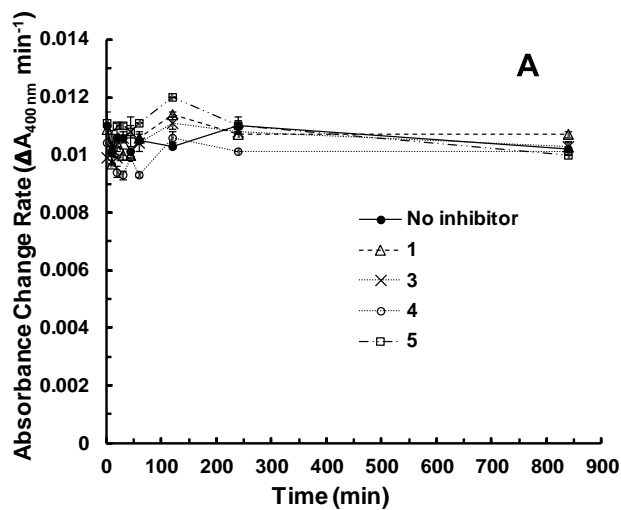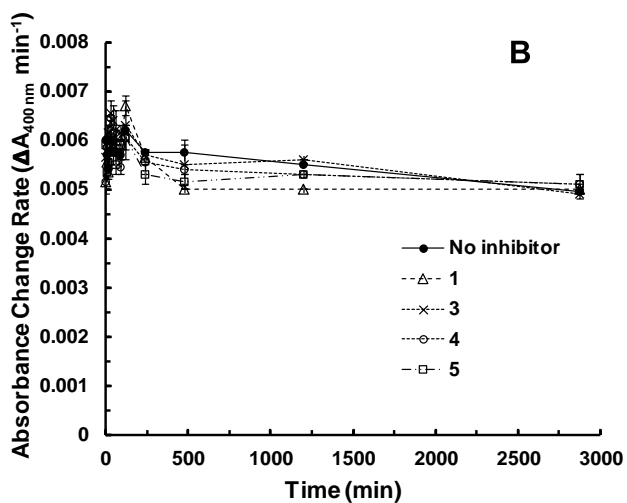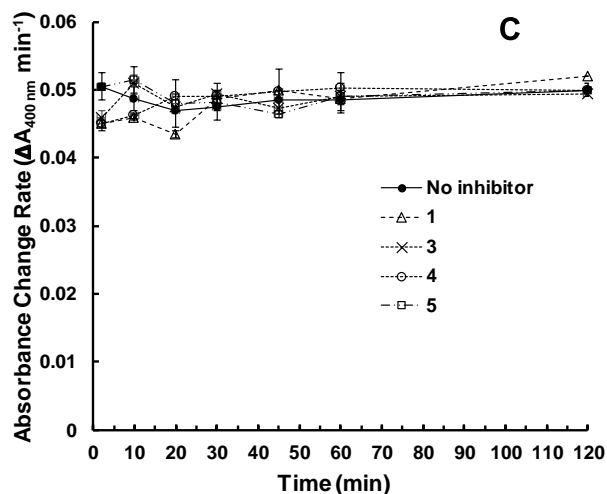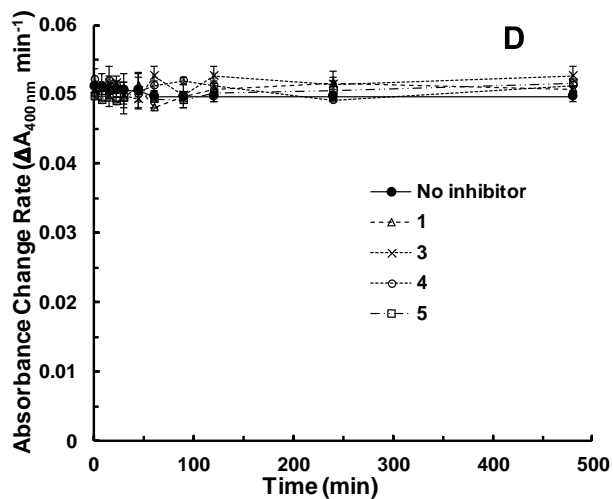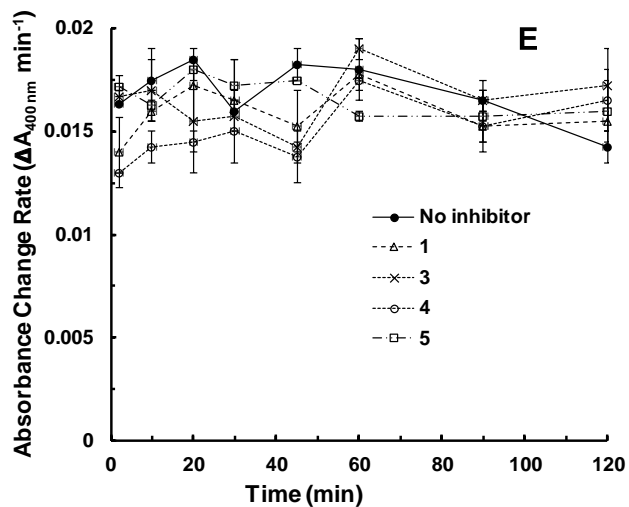



$^1\text{H}$ ,  $^{13}\text{C}$ , and  $^{19}\text{F}$  NMR spectra of 5-acetamido-2,3,5-trideoxy-3-fluoro-D-erythro- $\alpha$ -L-gluco-non-2-  
ulopyranosylonic fluoride (2e3eDFNeu5Ac) (**1**)

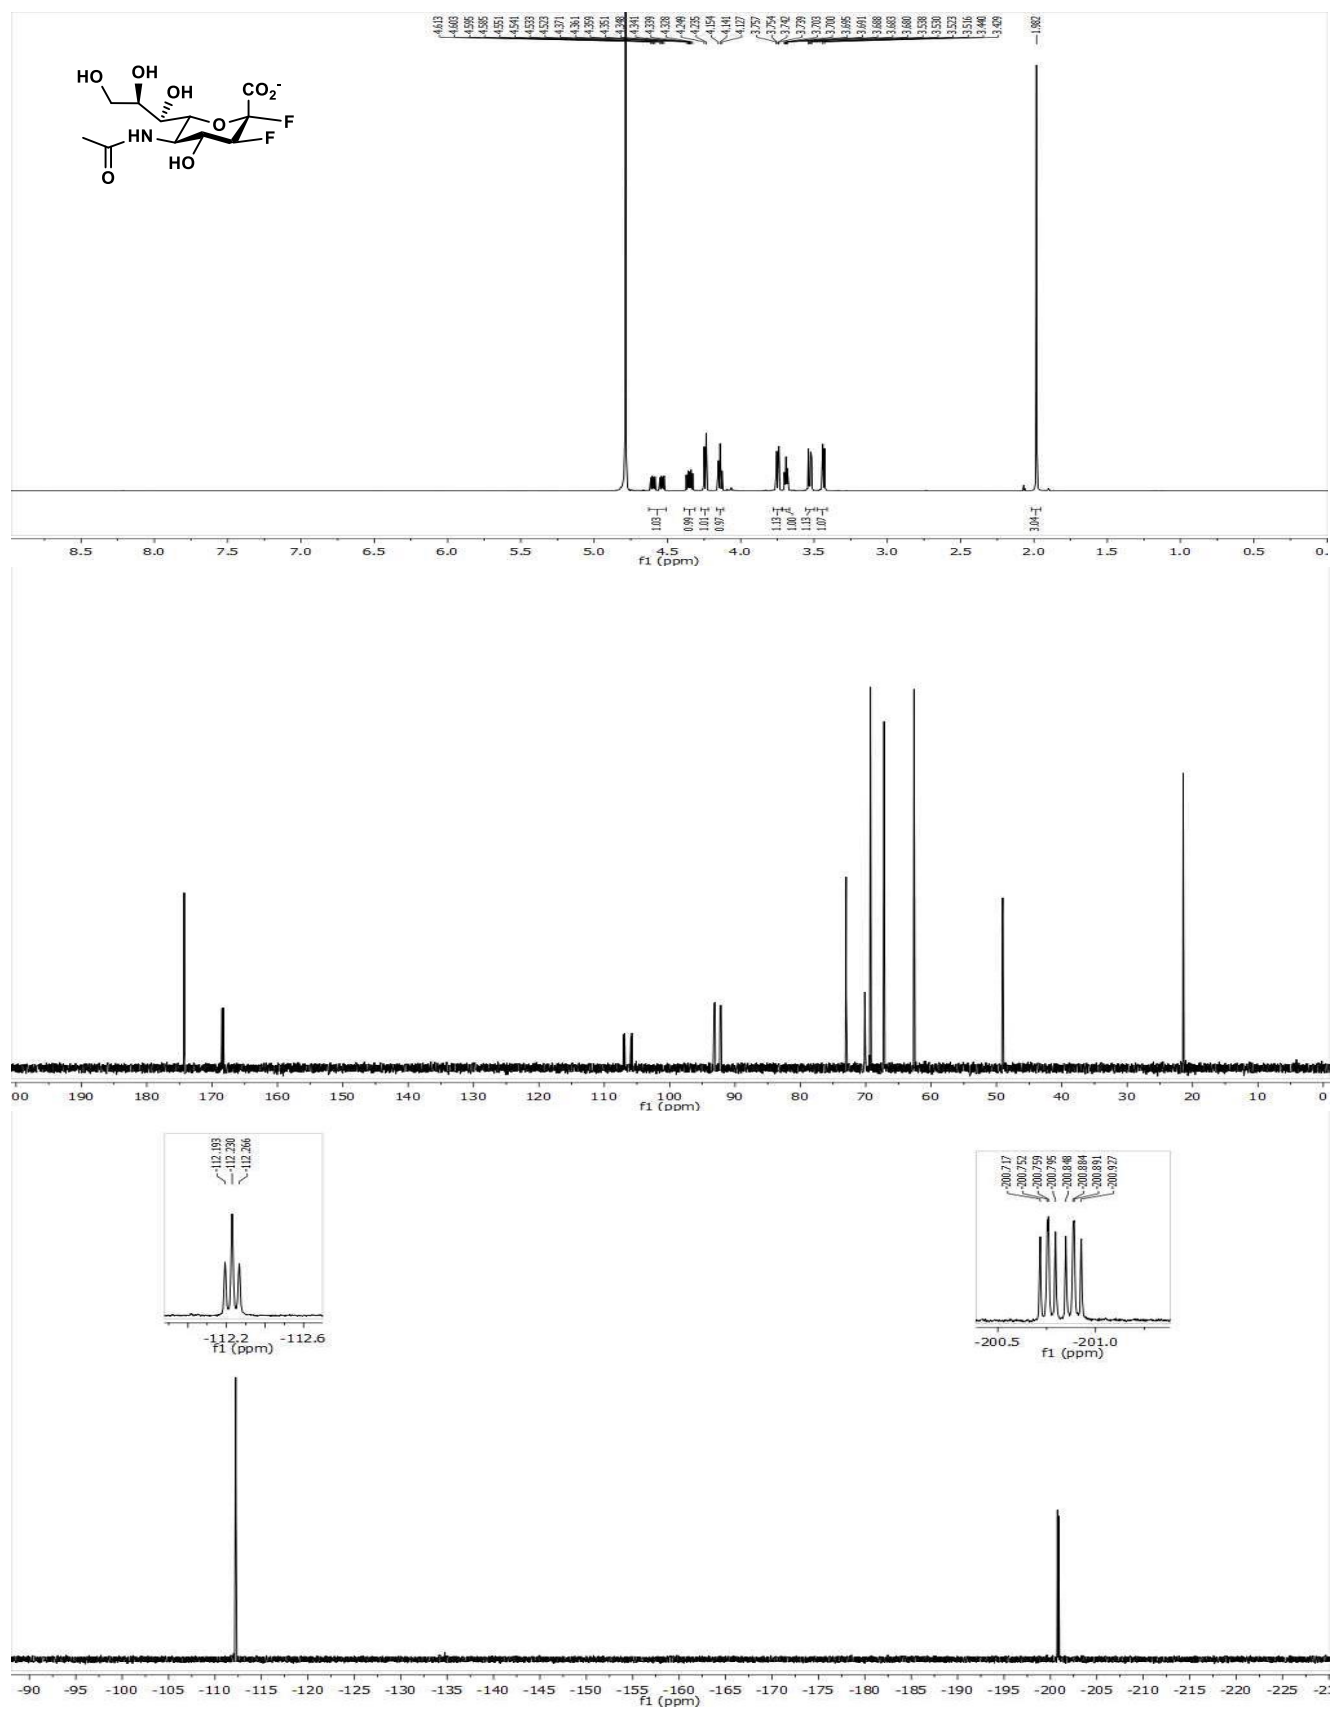

$^1\text{H}$ ,  $^{13}\text{C}$ ,  $^{19}\text{F}$  NMR spectra of 5-acetamido-9-azido-2,3,5,9-tetra-deoxy-3-fluoro-D-erythro- $\alpha$ -L-gluconon-2-ulo-pyranosylonic fluoride (2e3eDFNeu5Ac9N<sub>3</sub>) (**2**)

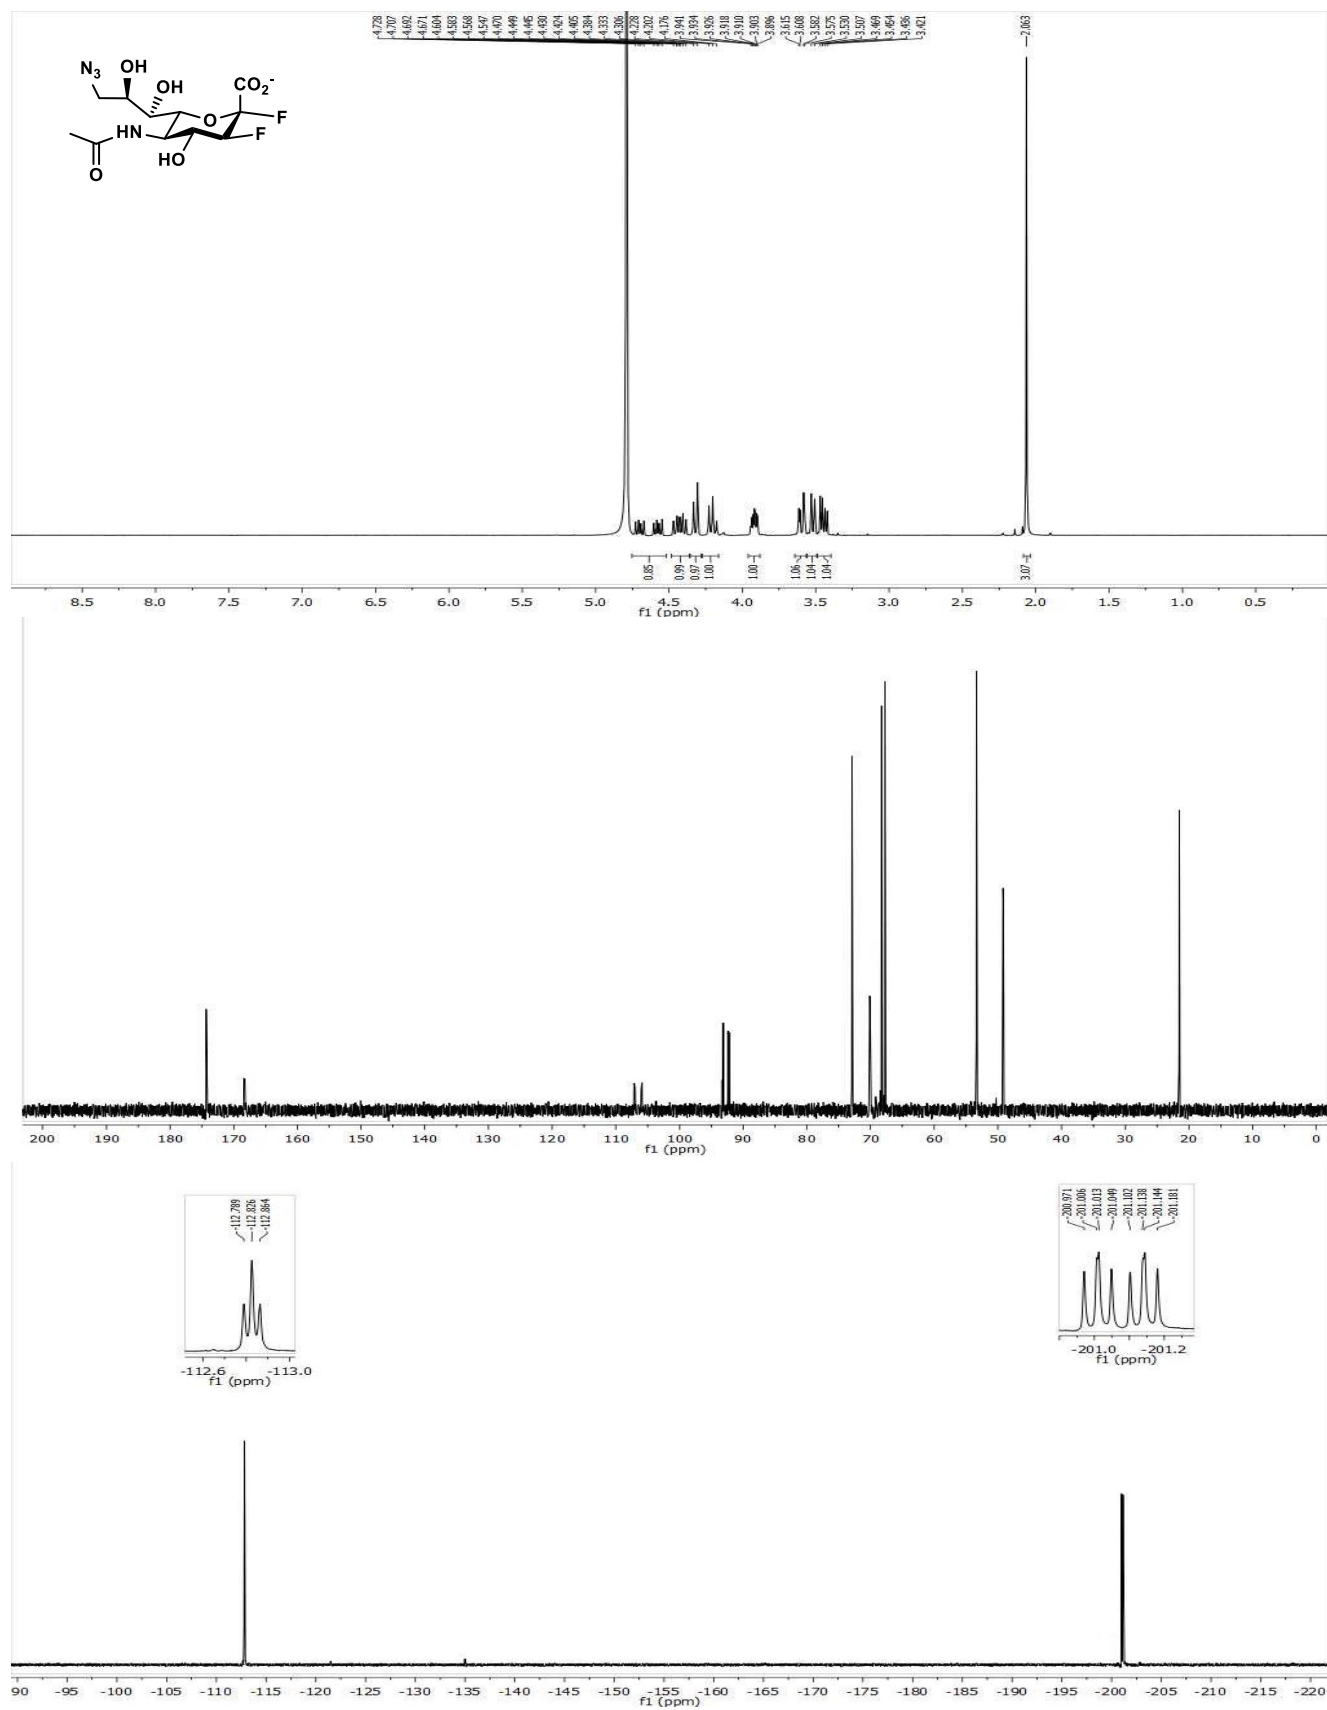

$^1\text{H}$ ,  $^{13}\text{C}$ , and  $^{19}\text{F}$  NMR spectra of 5-azido-2,3,5-trideoxy-3-fluoro-D-erythro- $\alpha$ -L-gluco-non-2-  
ulopyranosylonic fluoride (*2e3e*Neu5N<sub>3</sub>) (**3**)

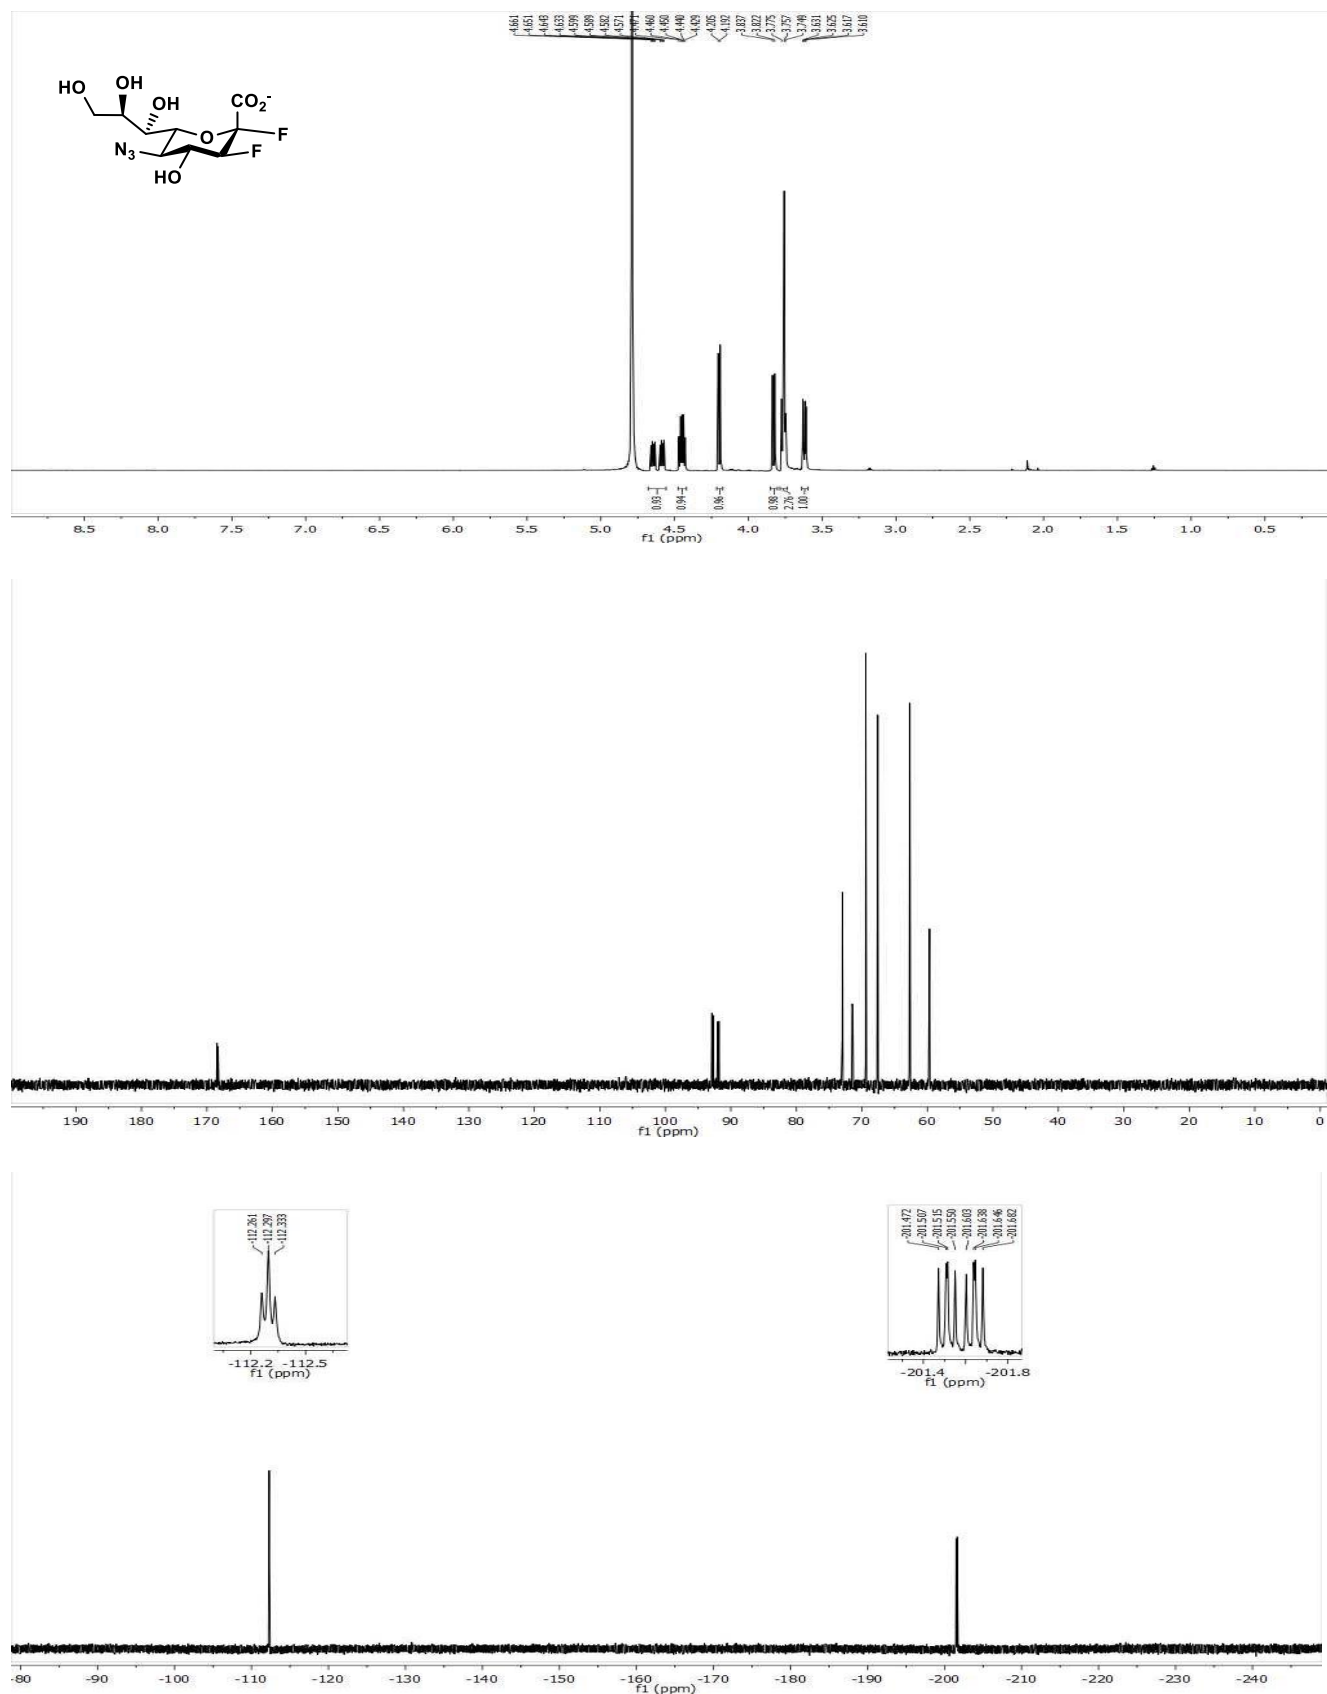

$^1\text{H}$ ,  $^{13}\text{C}$ , and  $^{19}\text{F}$  NMR spectra of 5-glycolamido-2,3,5-trideoxy-3-fluoro-D-erythro- $\alpha$ -L-gluco-non-2-  
ulopyranosylonic fluoride (*2e3eDFNeu5Gc*) (**4**)

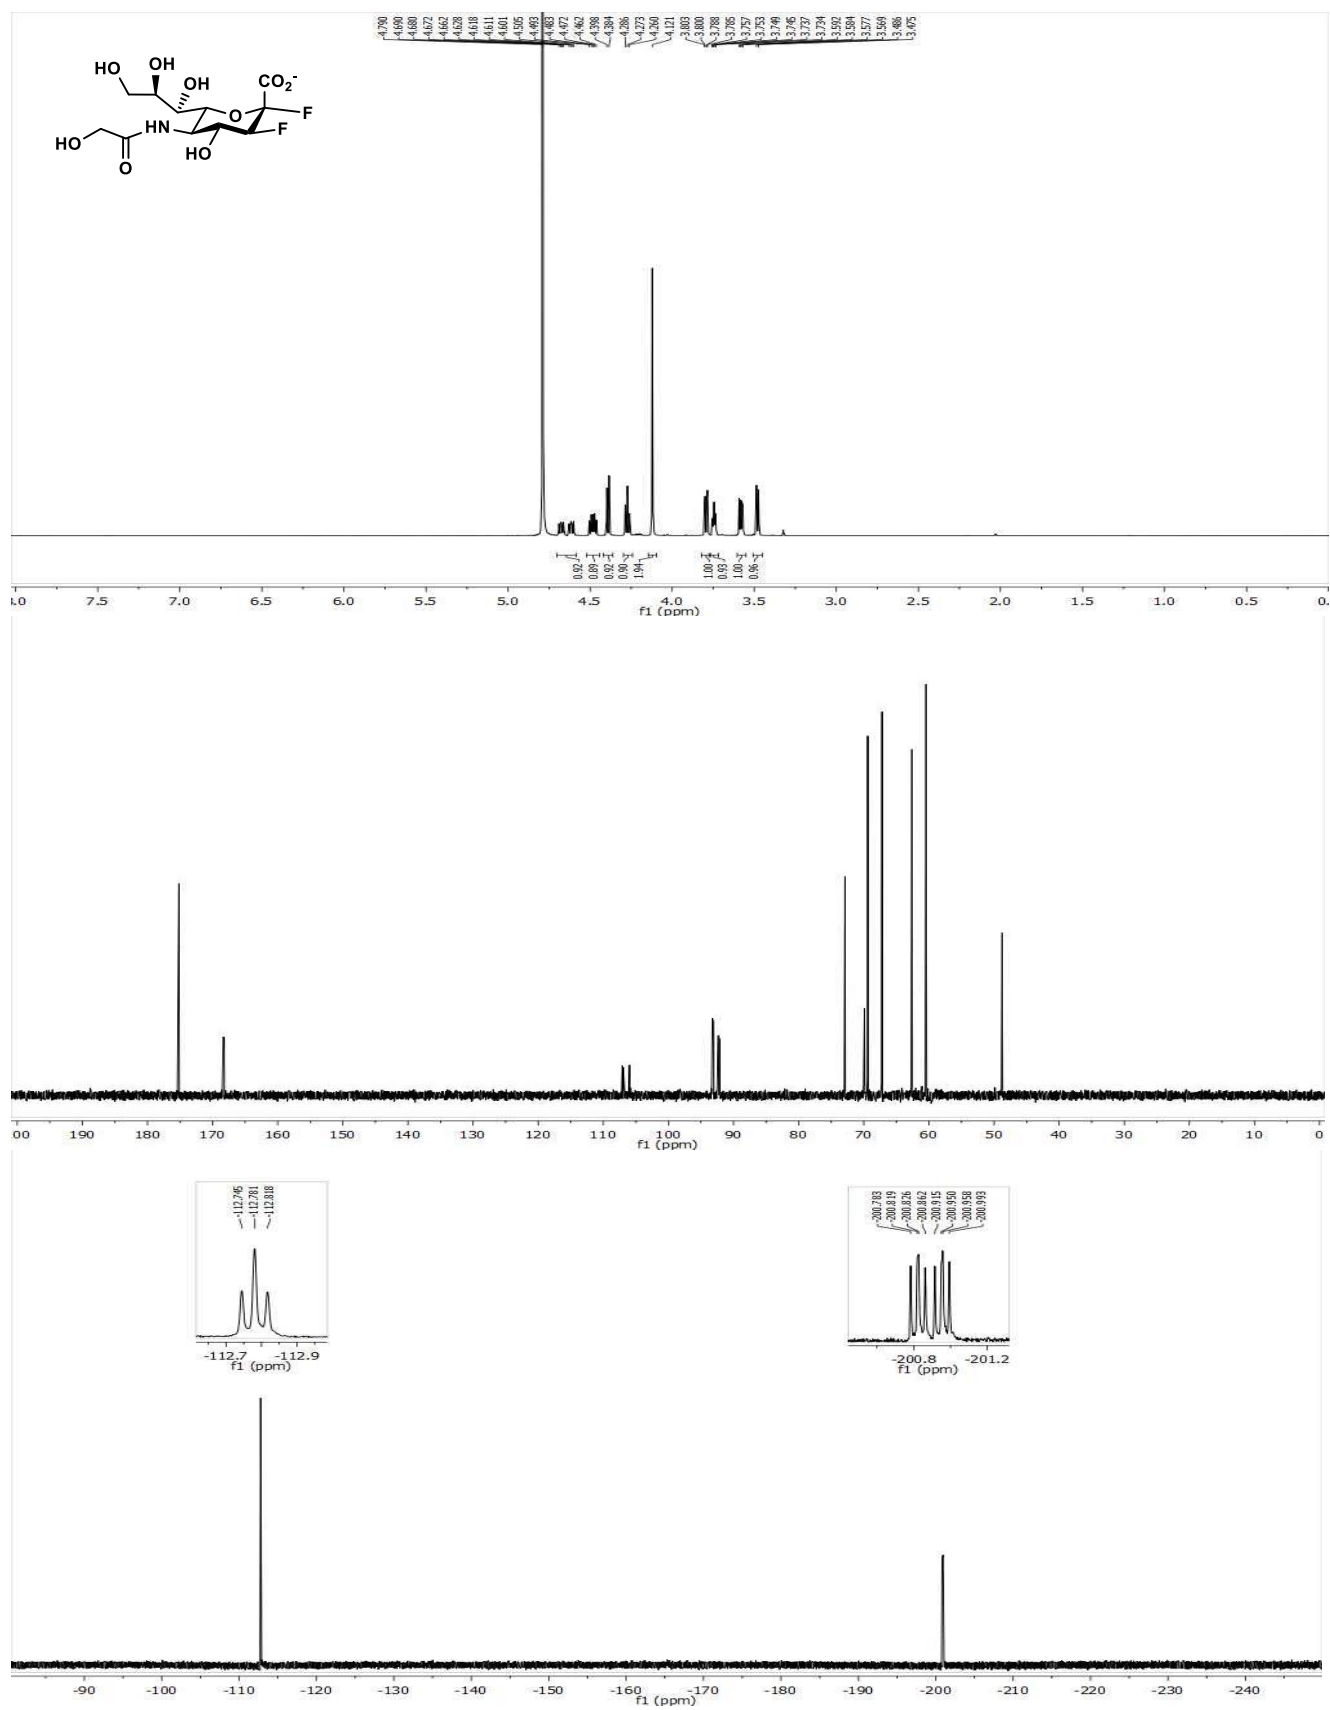

$^1\text{H}$ ,  $^{13}\text{C}$ , and  $^{19}\text{F}$  NMR spectra of 5-acetamido-2,3,5-trideoxy-3-fluoro-D-erythro- $\alpha$ -L-manno-non-2-  
ulopyranosylonic fluoride (*2e3aDFNeu5Ac*) (**5**)

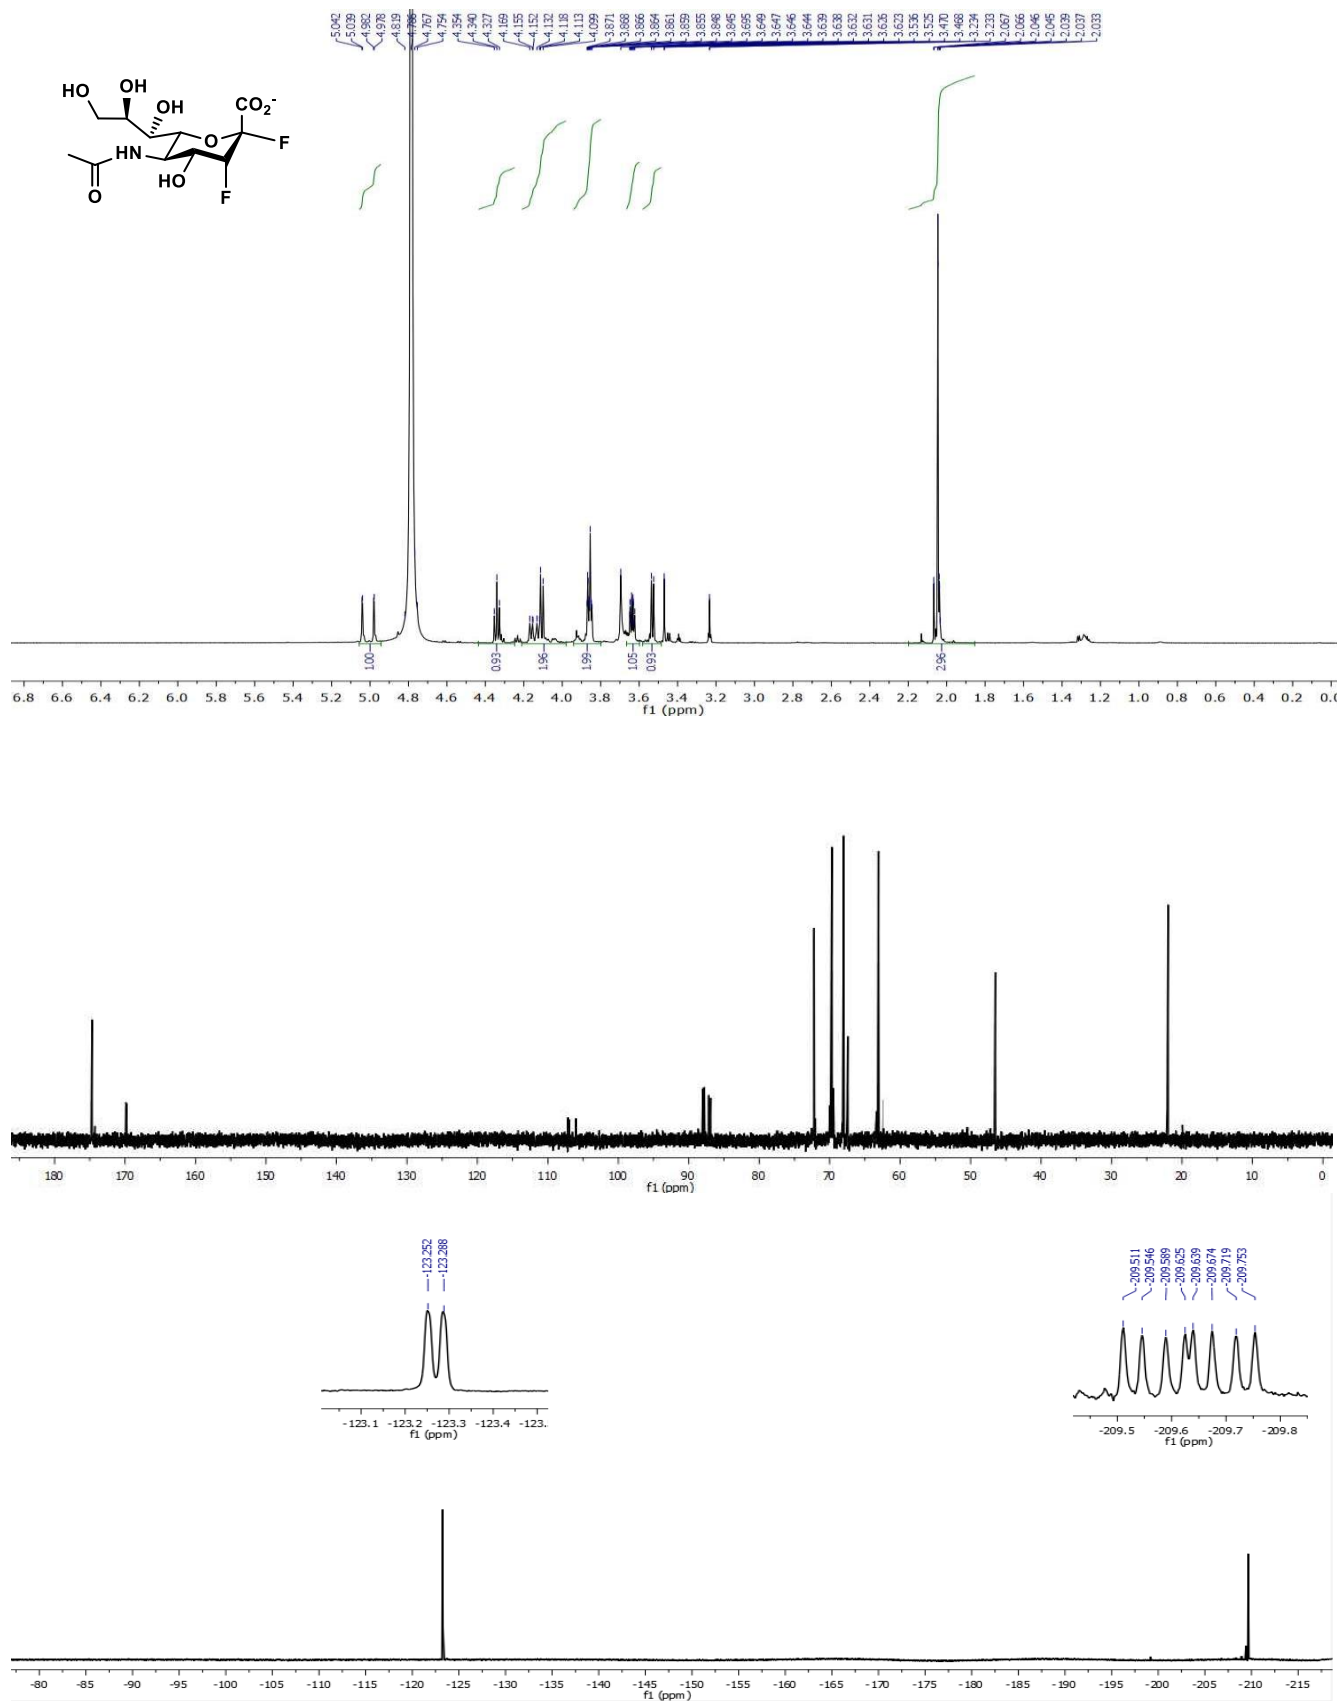

$^1\text{H}$ ,  $^{13}\text{C}$ ,  $^{19}\text{F}$  NMR spectra of 5-acetamido-9-azido-2,3,5,9-tetraoxy-3-fluoro-D-erythro- $\alpha$ -L-mannono-2-ulopyranosylonic fluoride (*2e3aDFNeu5Ac9N3*) (**6**)

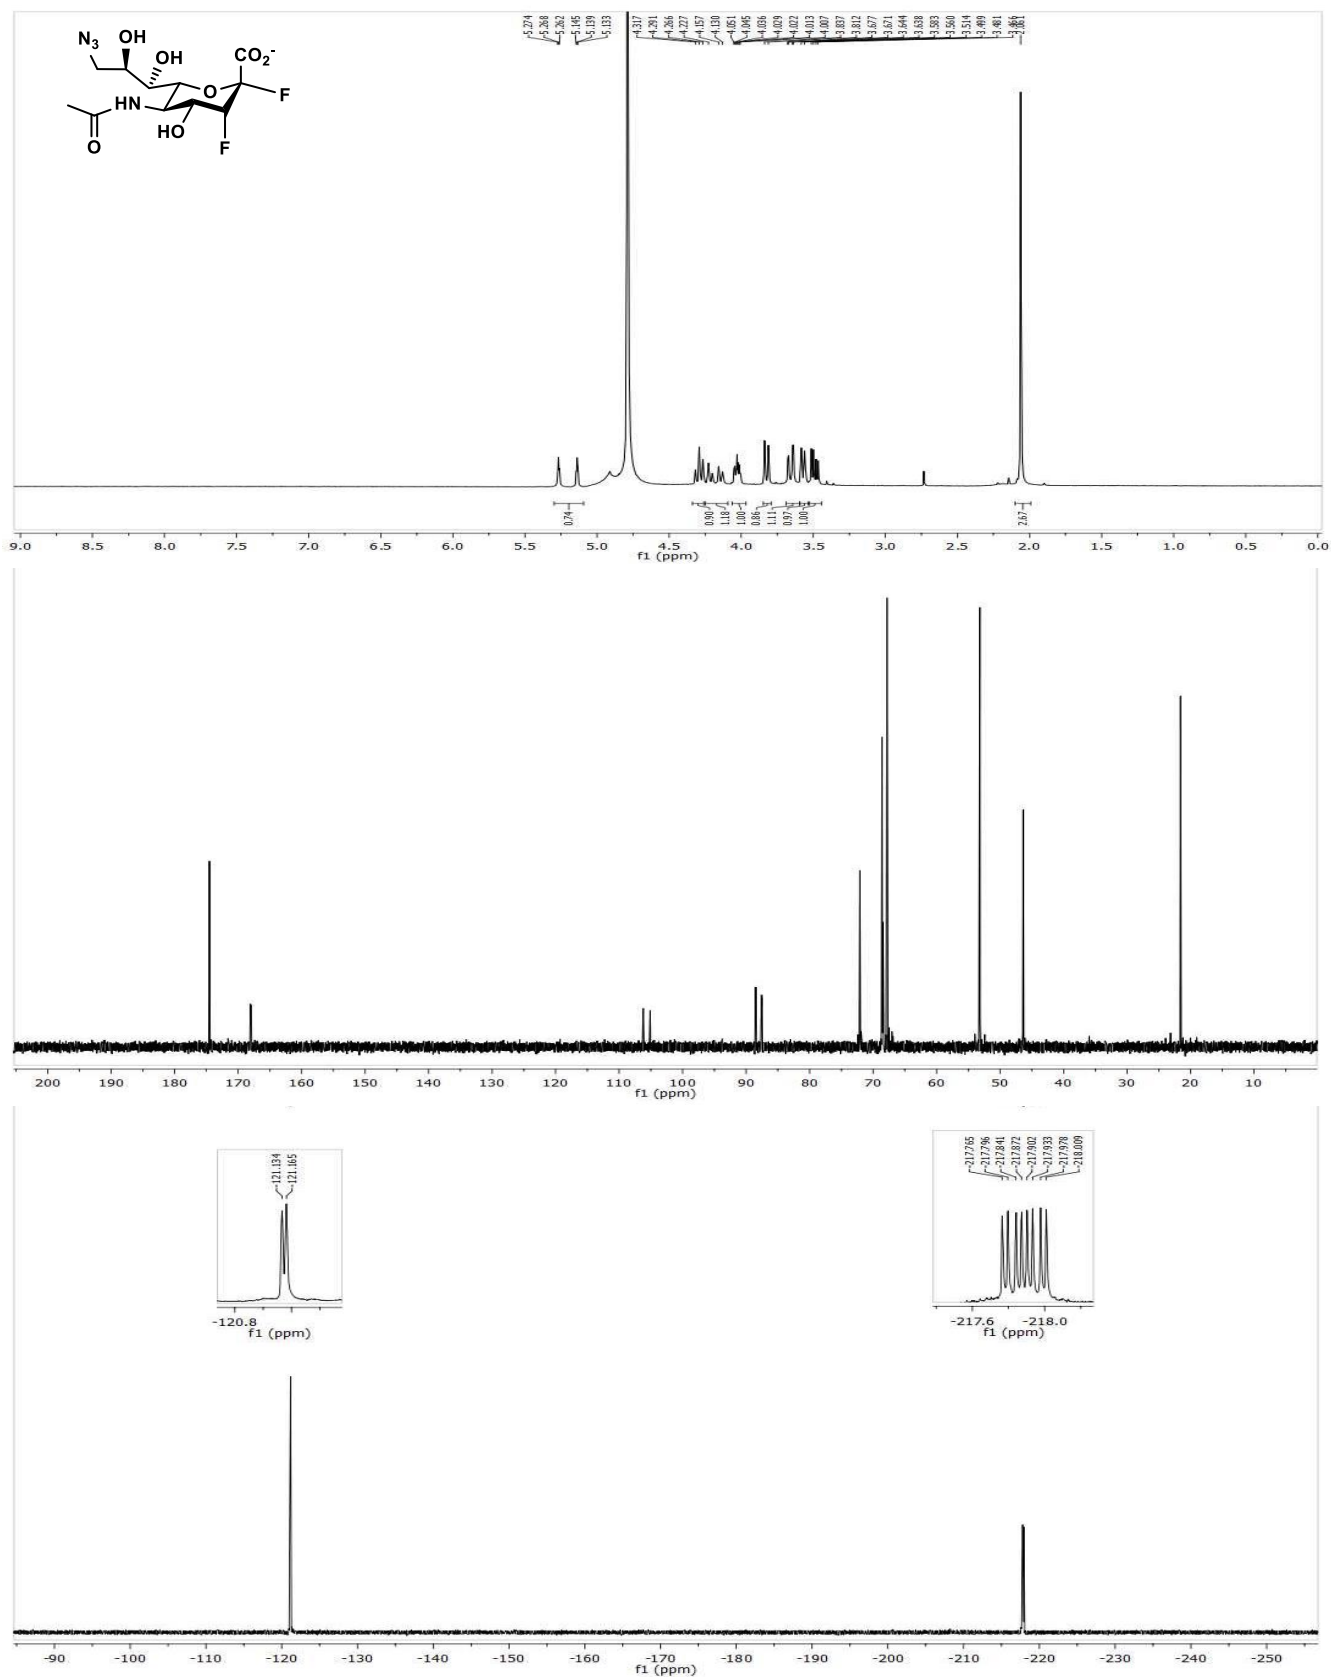

$^1\text{H}$ ,  $^{13}\text{C}$ , and  $^{19}\text{F}$  NMR spectra of 5-azido-3,5-dideoxy-3-fluoro-D-erythro-L-gluco-2-nonulopyranosonic acid 3F(e)Neu5N<sub>3</sub> (**11**)

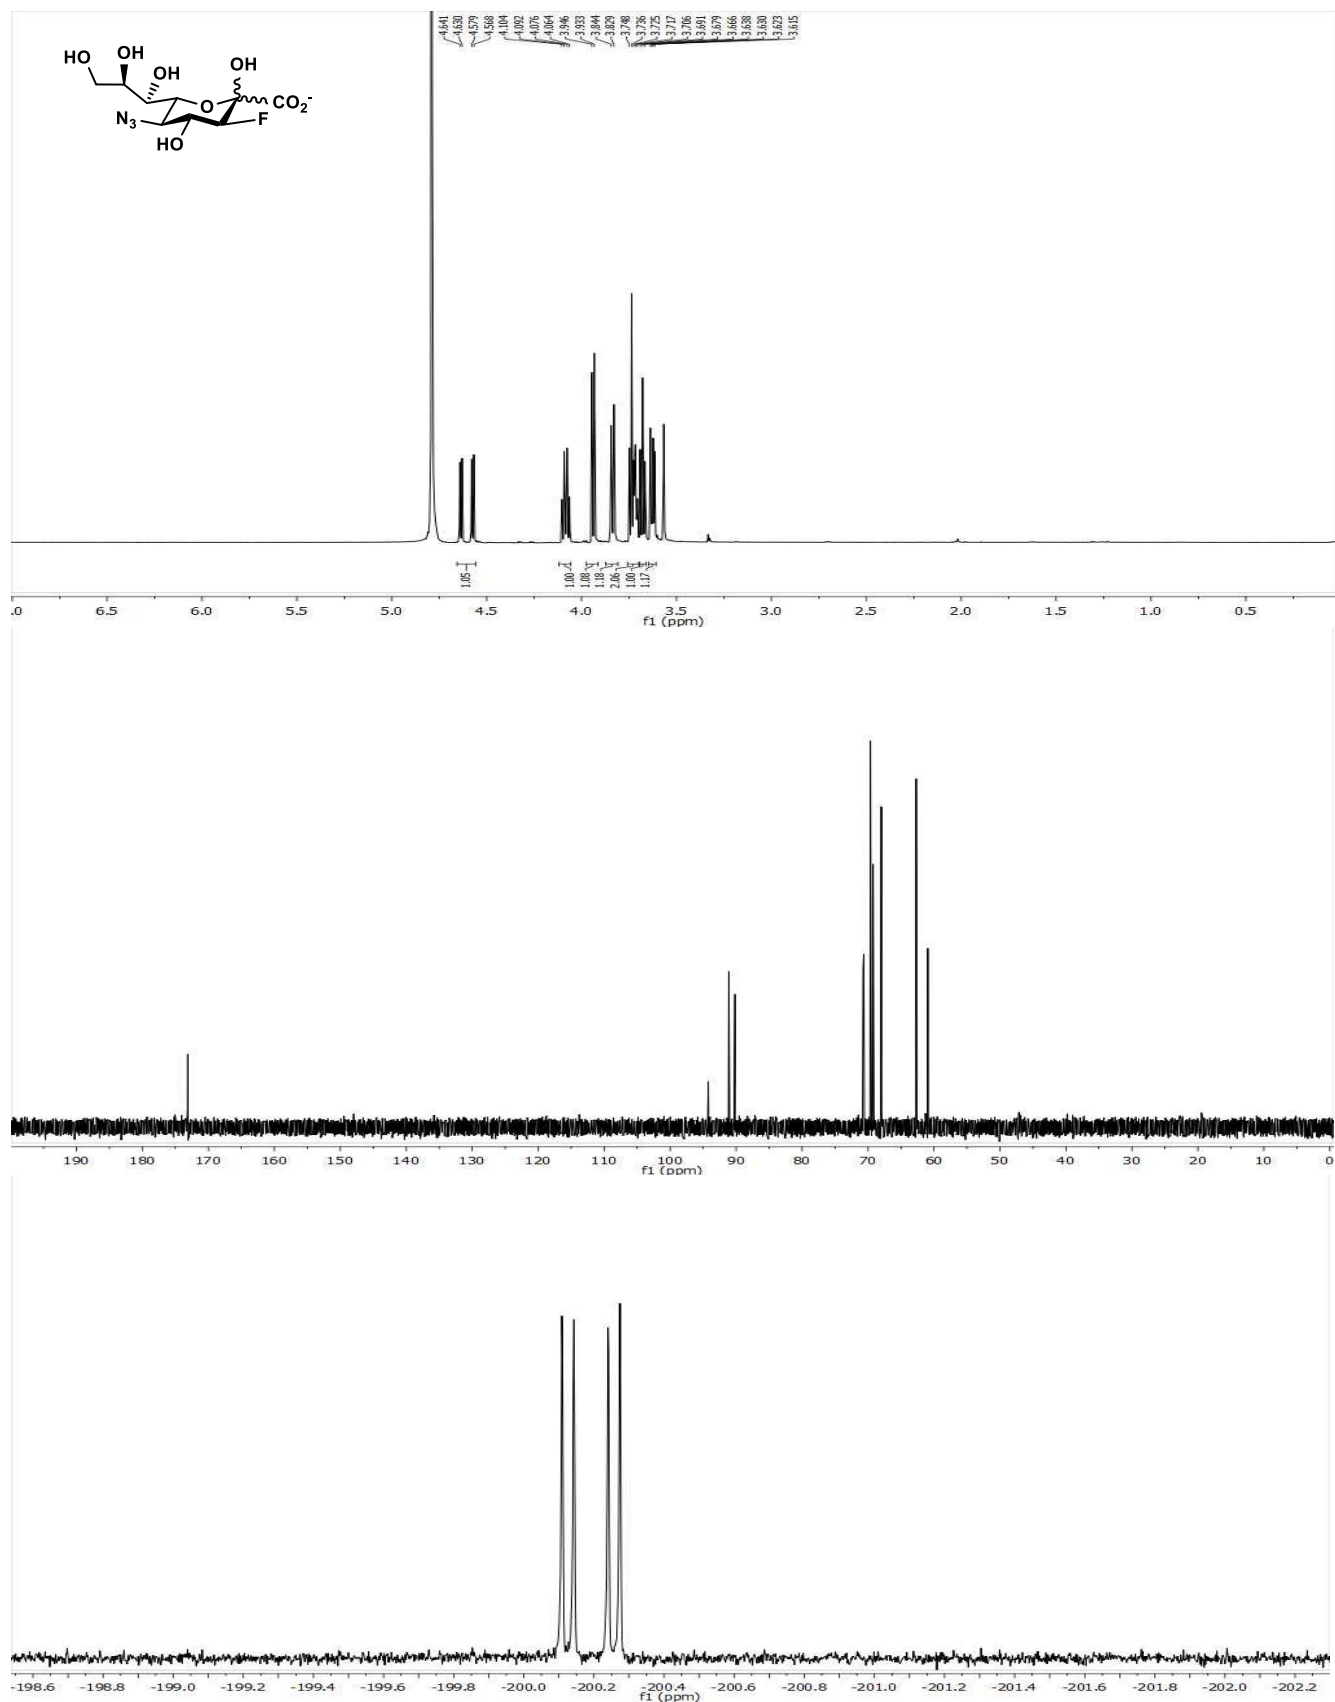

$^1\text{H}$ ,  $^{13}\text{C}$ , and  $^{19}\text{F}$  NMR spectra of methyl 5-azido-2,4,7,8,9-penta-*O*-acetyl-3,5-dideoxy-3-fluoro-D-*erythro*-L-*gluco*-non-2-ulopyranosonate (**12**)

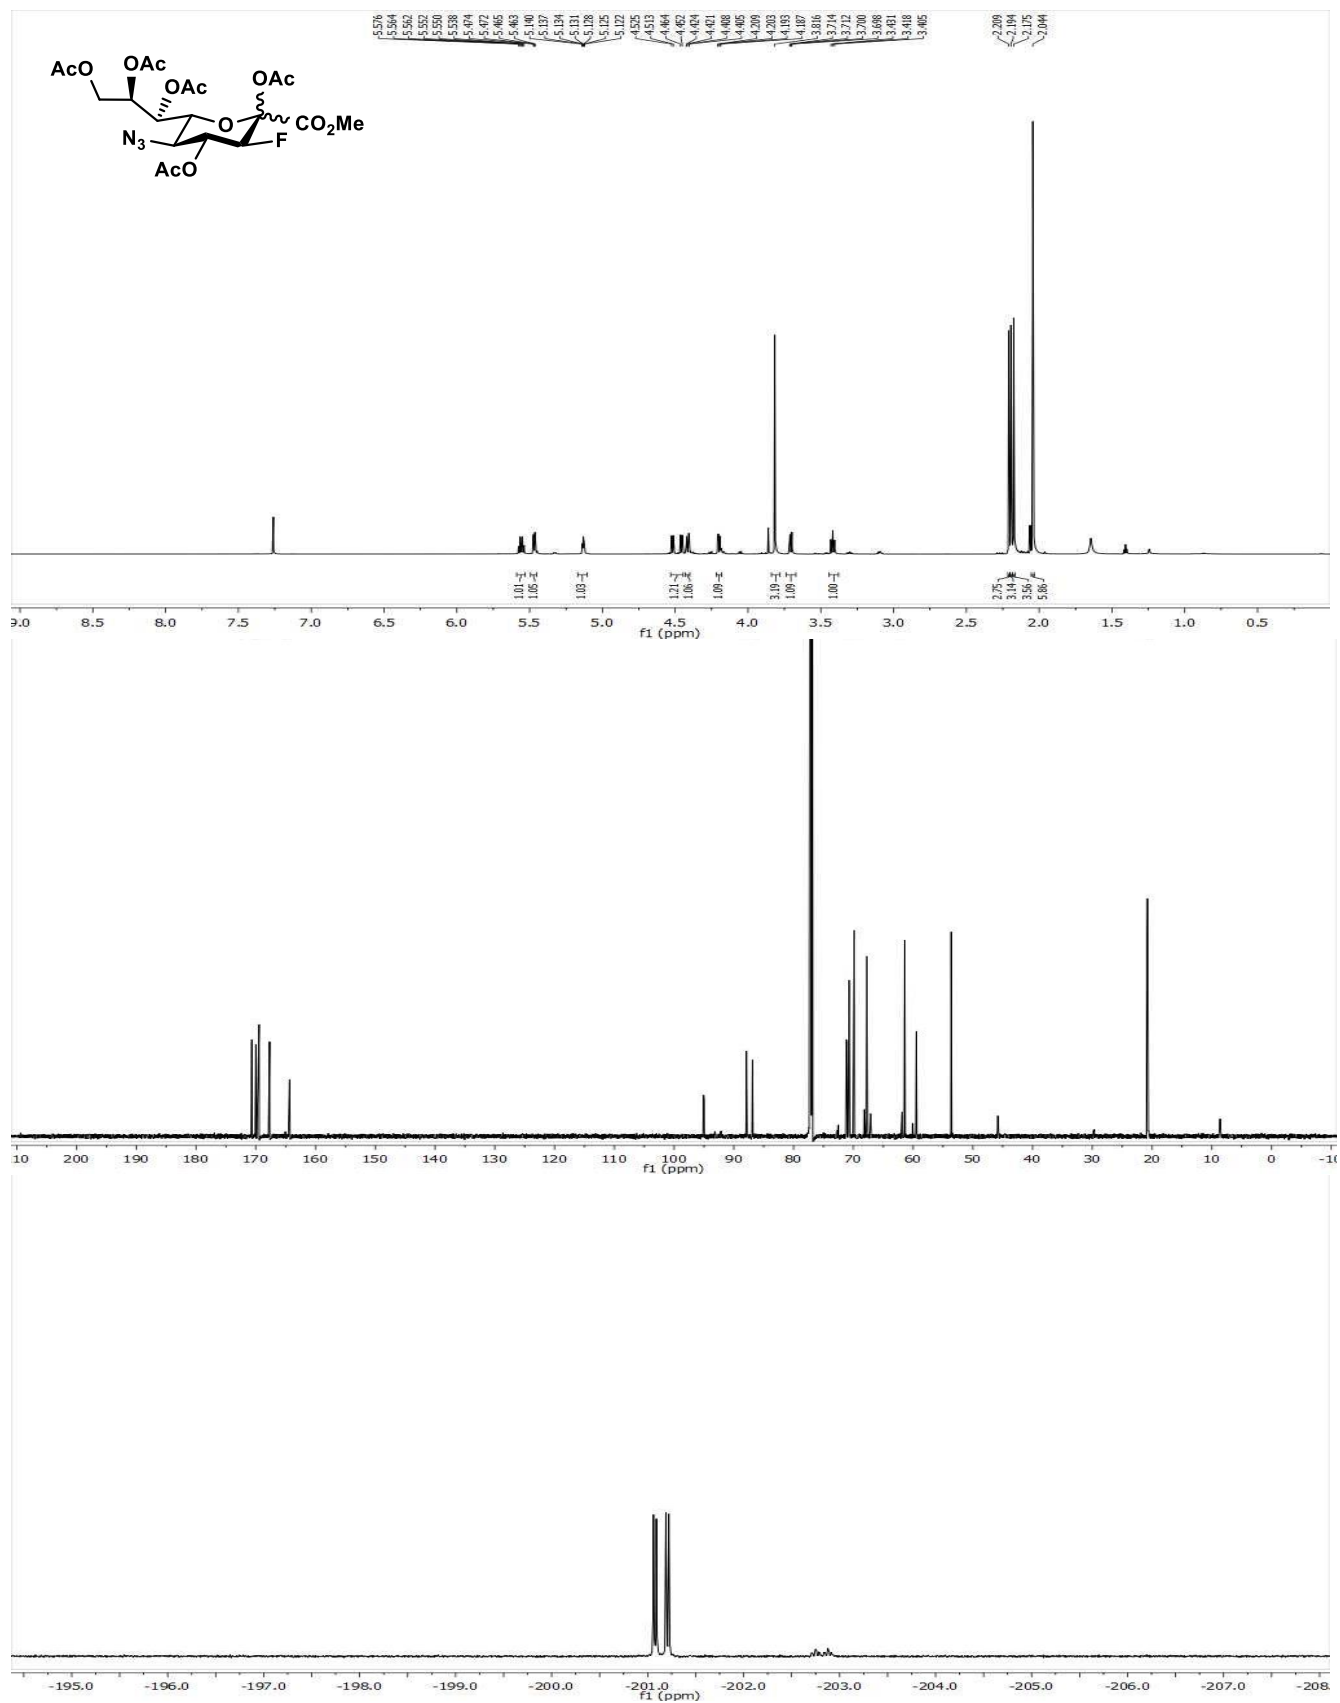



$^1\text{H}$ ,  $^{13}\text{C}$ , and  $^{19}\text{F}$  NMR spectra of methyl 5-acetamido-4,7,8,9-tetra-*O*-acetyl-2,3,5-trideoxy-3-fluoro-D-*erythro*- $\alpha$ -L-gluco-non-2-ulopyranosylonate fluoride (**13**)

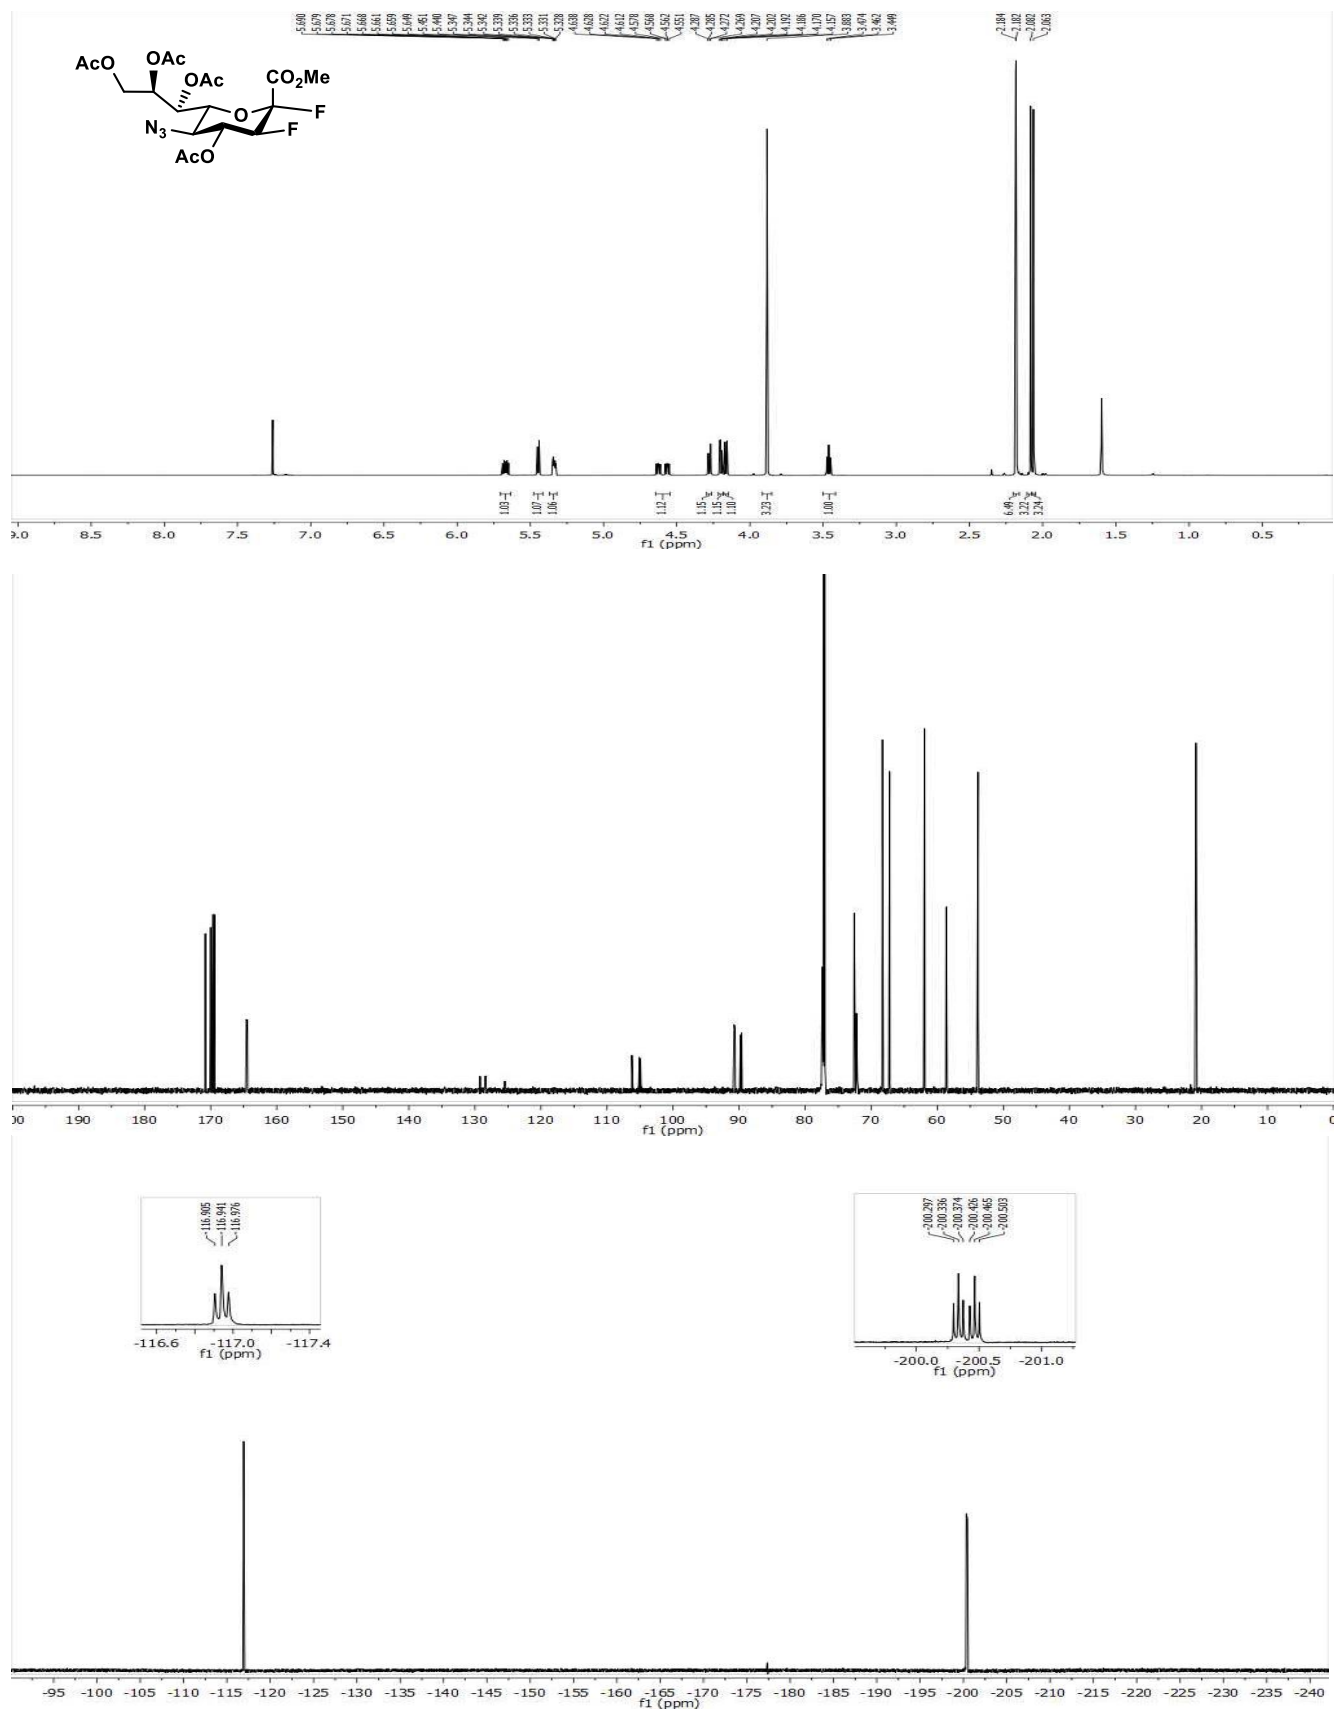

Supplement: NIHMS1040648-supplement-SI.pdf [file NIHMS1040648-supplement-SI.pdf]
